# Supplementary material for: Effect of morphology and impact of the electrode/electrolyte interface on the PEC response of Fe2O3 based systems – comparison of two preparation techniques
Source: Royal Society of Chemistry journal article supplement (doi:10.1039/d0ra07870k), 2020-01-01
Supplement: d0ra07870k1.pdf [file d0ra07870k1.pdf]

## Effect of morphology and impact of electrode/electrolyte interface on the PEC response of Fe<sub>2</sub>O<sub>3</sub> based systems- Comparison of two preparation techniques

*Kumari Asha<sup>a</sup>, Vibha Rani Satsangi<sup>b</sup>, Rohit Shrivastav<sup>a</sup>, Rama Kant<sup>c</sup>, Sahab Dass<sup>a\*</sup>*

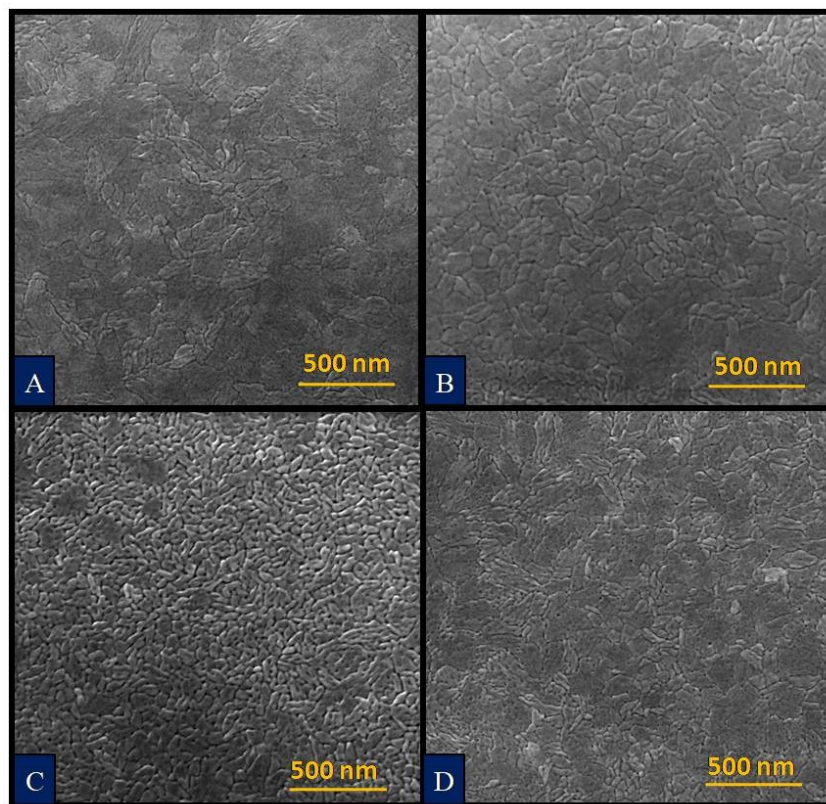

**Figure S1.** FE-SEM images of Fe<sub>2</sub>O<sub>3</sub> thin films prepared by spray pyrolysis with (A) 20s, (B) 30s, (C) 40s and (D) 50s spray time

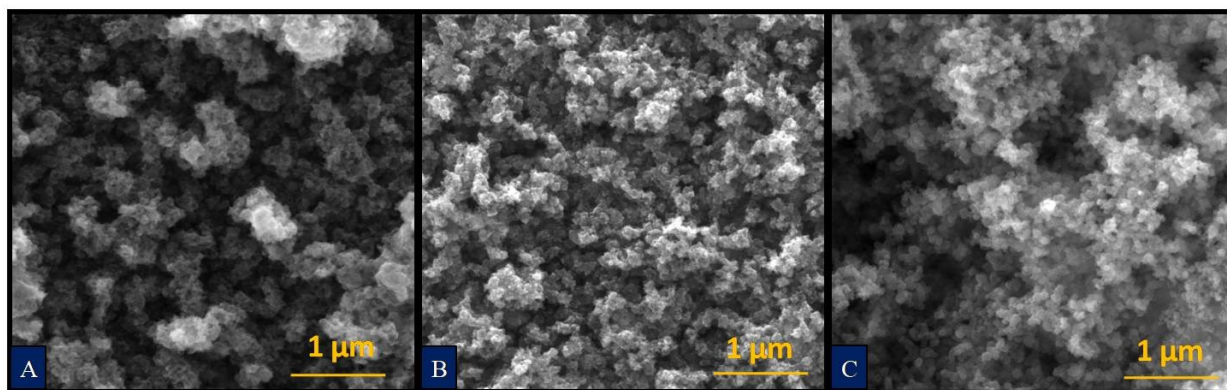

**Figure S2.** FE-SEM images of Fe<sub>2</sub>O<sub>3</sub> thin films prepared by electrodeposition with (A) 50 cycles, (B) 100 cycles and (C) 150 cycles of deposition

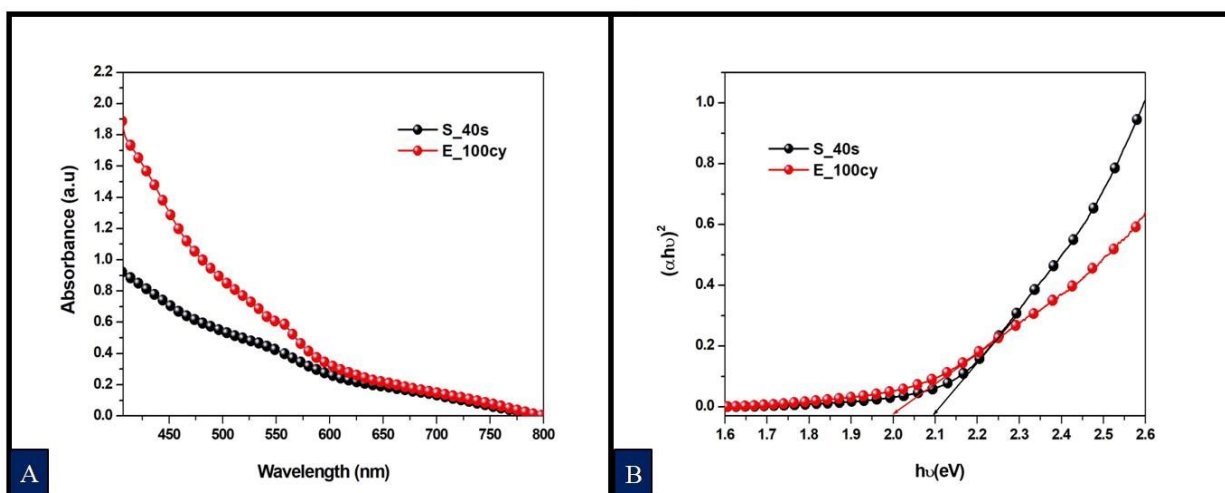

**Figure S3.** (A) UV-Visible absorption spectra and (B) Tauc plot of Fe<sub>2</sub>O<sub>3</sub> thin films prepared by spray pyrolysis and electrodeposition

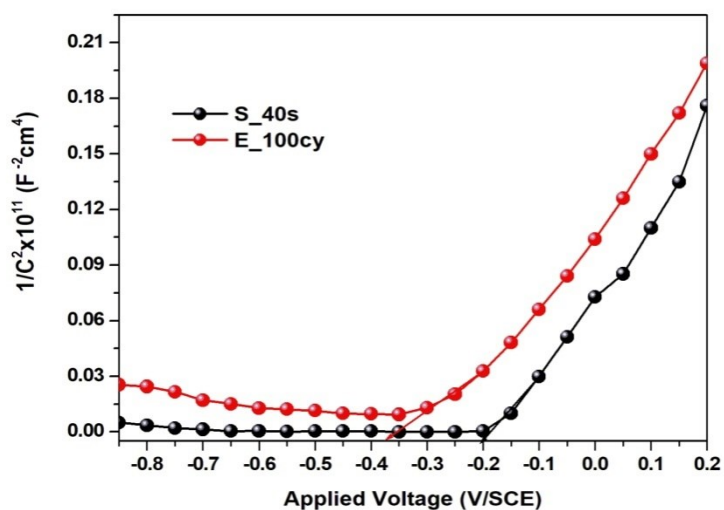

**Figure S4.** Mott-Schottky plot of Fe<sub>2</sub>O<sub>3</sub> thin films prepared by spray pyrolysis and electrodeposition

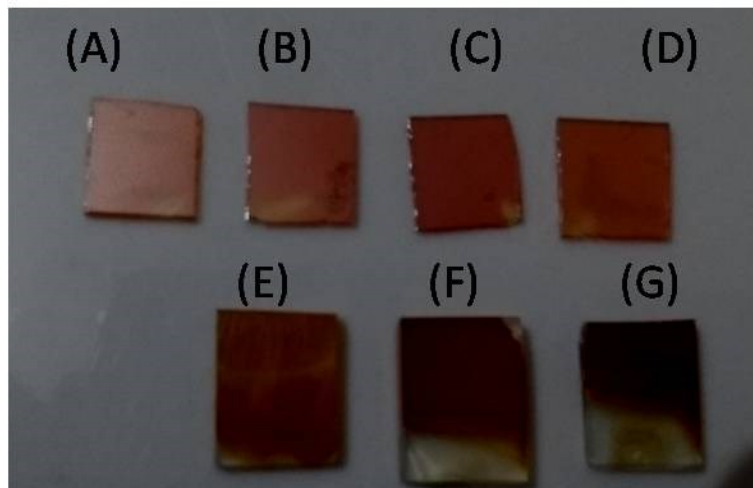

**Figure S5.** Fe<sub>2</sub>O<sub>3</sub> thin films prepared by spray pyrolysis with (A) 20s, (B) 30s, (C) 30s and (D) 40s spray time and by electrodeposition with (E) 50 cycles, (F) 100 cycles and (G) 150 cycles

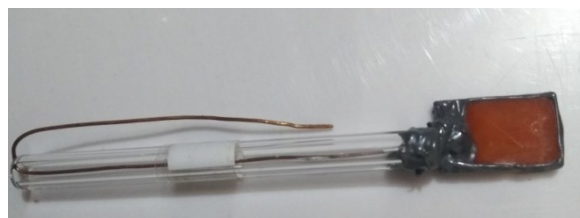

**Figure S6.** Prepared Fe<sub>2</sub>O<sub>3</sub> electrode

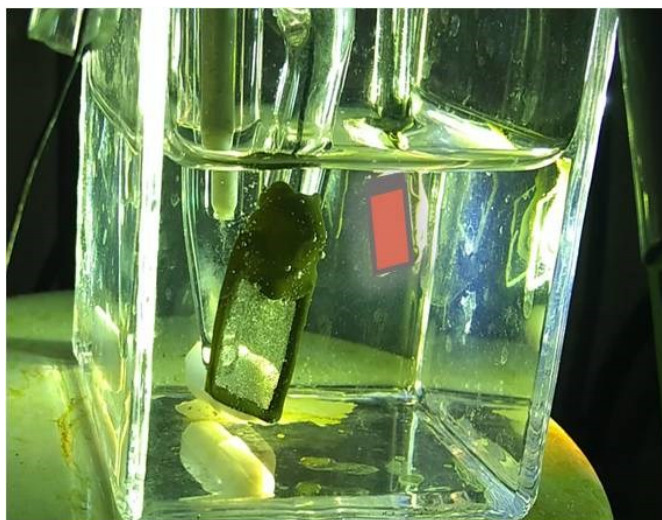

**Figure S7.** Three electrode assembly set up for electrochemical and photoelectrochemical analysis

| <b>Sample<br/>Description</b> | <b>R<sub>s</sub></b> | <b>R<sub>ct</sub></b> | <b>C<sub>dl</sub></b> |
|-------------------------------|----------------------|-----------------------|-----------------------|
| S_40s                         | 21.47 Ω              | 20.7 kΩ               | 928 nF                |
| E_100 cy                      | 17.45 Ω              | 9.1 kΩ                | 1.12 μF               |

**Table S1.** Equivalent Randles circuit parameters used for fitting EIS data
